# Supplementary material for: Correlative all-optical quantification of mass density and mechanics of subcellular compartments with fluorescence specificity
Source: eLife journal article supplement (doi:10.7554/elife.68490), 2022-01-10

532 nm – full cell acquisition

a)

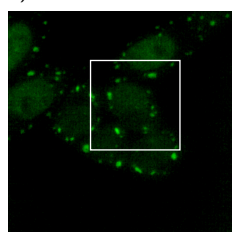

Fluorescence  
intensity of GFP  
(green)

$t = 0$  s  
exposure 900 ms

532 nm – partial acquisition

b)

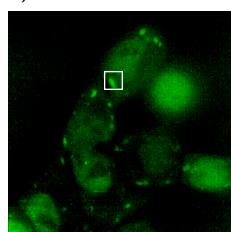

780 nm – full cell acquisition

c)

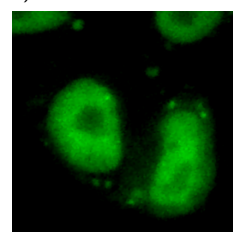

d)

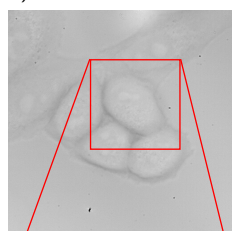

Brightfield intensity

$t = 1$  s  
exposure 4 ms

e)

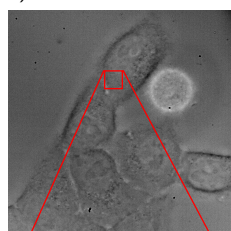

f)

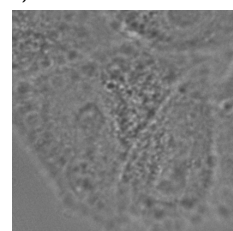

g)

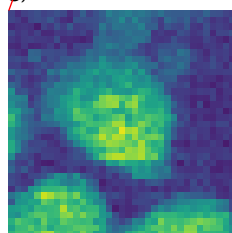

Brillouin shift

$t = 1$  min  
duration 20 min

h)

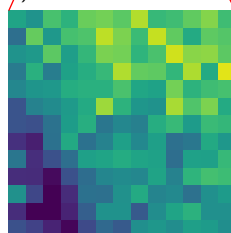

i)

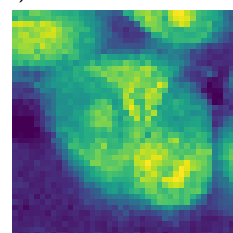

$v_B^*$  [GHz]

8.1

7.9

7.7

7.5

j)

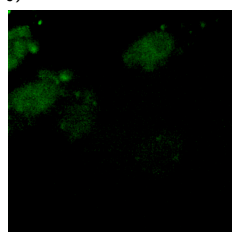

Fluorescence  
intensity of GFP  
(green) after  
Brillouin acquisition

$t = 21$  min  
exposure 900 ms

k)

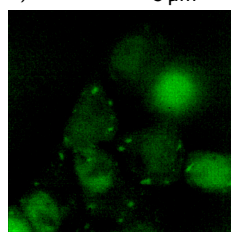

3  $\mu$ m

l)

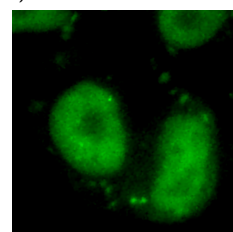

m)

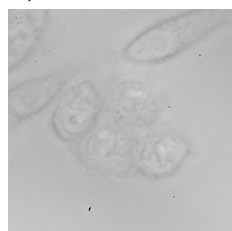

Brightfield intensity  
after Brillouin  
acquisition

$t = 21$  min  
exposure 4 ms

n)

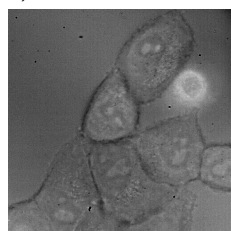

o)

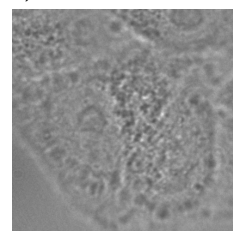

p)

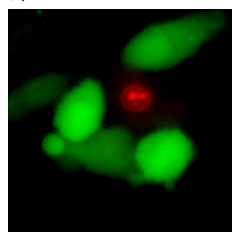

Viability staining  
with fluorescein  
(green) and PI  
(red) after Brillouin  
acquisition

$t = 31$  min  
exposure 900 ms

q)

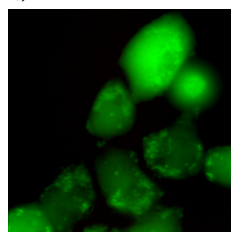

r)

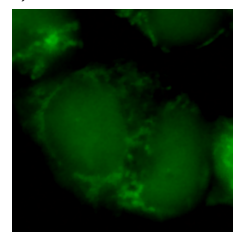

Supplement: supp [file elife-68490-supp-v1.zip › elife_poa_e68490_Figure_4_figure_supplement_1.pdf]
