# Supplementary material for: Correlative all-optical quantification of mass density and mechanics of subcellular compartments with fluorescence specificity
Source: eLife journal article supplement (doi:10.7554/elife.68490), 2022-01-10
Supplement: supp [file elife-68490-supp-v1.zip]

Archive with 12 entries (12 files):
- elife_poa_e68490_Transparent_Reporting_File.pdf
- elife_poa_e68490_Figure_2_source_data_1.xlsx
- elife_poa_e68490_Figure_3_source_data_1.xlsx
- elife_poa_e68490_Figure_4_source_data_1.xlsx
- elife_poa_e68490_Supplementary_file_1.docx
- elife_poa_e68490_Supplementary_file_2.docx
- elife_poa_e68490_Supplementary_file_3.docx
- elife_poa_e68490_Supplementary_file_4.docx
- elife_poa_e68490_Figure_1_figure_supplement_1.pdf
- elife_poa_e68490_Figure_2_figure_supplement_1.pdf
- elife_poa_e68490_Figure_4_figure_supplement_1.pdf
- elife_poa_e68490_Figure_4_figure_supplement_2.pdf
