# Supplementary material for: Correlative all-optical quantification of mass density and mechanics of subcellular compartments with fluorescence specificity
Source: eLife journal article supplement (doi:10.7554/elife.68490), 2022-01-10

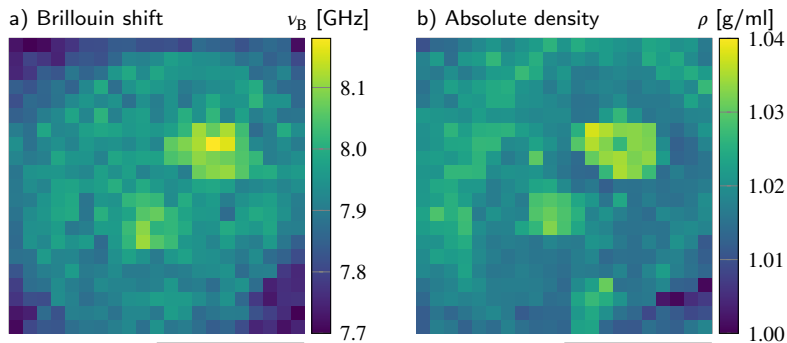

c) Brillouin shift of different compartments

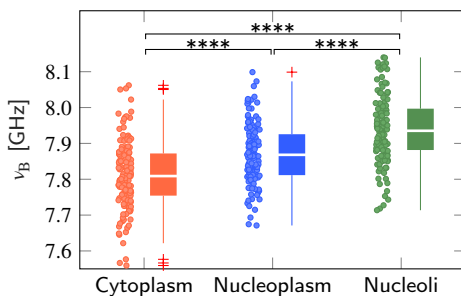

d) Absolute density of different compartments

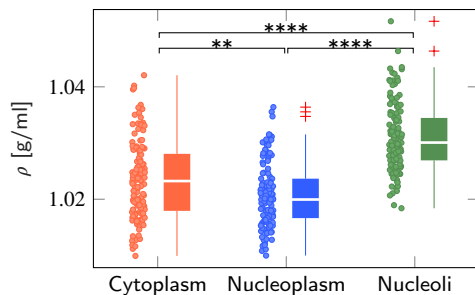

e) Peak linewidth of different compartments

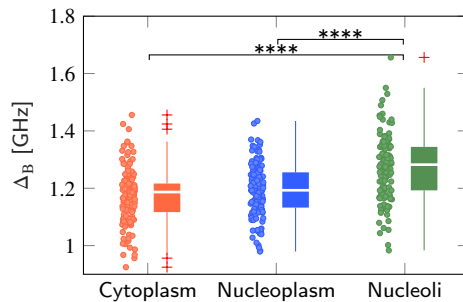

Supplement: supp [file elife-68490-supp-v1.zip › elife_poa_e68490_Figure_2_figure_supplement_1.pdf]
