# Supplementary material for: Correlative all-optical quantification of mass density and mechanics of subcellular compartments with fluorescence specificity
Source: eLife journal article supplement (doi:10.7554/elife.68490), 2022-01-10
Supplement: supp [file elife-68490-supp-v1.zip › elife_poa_e68490_Figure_2_source_data_1.xlsx]

## Sheet: Refractive index
	Refractive index
	cytoplasm	nucleoplasm	nucleoli
	1.35525	1.35475	1.36466
	1.35254	1.35014	1.36108
	1.3647	1.36052	1.36903
	1.35696	1.35452	1.3673
	1.35428	1.3532	1.36086
	1.35107	1.34918	1.35997
	1.35845	1.35669	1.36671
	1.35067	1.35178	1.35981
	1.35422	1.35107	1.36105
	1.35867	1.35758	1.36462
	1.34929	1.34813	1.35752
	1.34797	1.34575	1.35285
	1.34971	1.34825	1.35676
	1.35607	1.35233	1.36183
	1.35291	1.35191	1.35951
	1.35682	1.35392	1.36296
	1.34964	1.34872	1.35557
	1.35576	1.35267	1.36151
	1.35887	1.35776	1.36293
	1.3596	1.35297	1.36309
	1.35762	1.35772	1.36459
	1.36174	1.35546	1.36506
	1.36235	NaN	NaN
	1.35961	NaN	NaN
	1.35381	1.35055	1.36421
	1.35002	NaN	NaN
	1.35032	1.35011	NaN
	1.35462	1.35806	1.36677
	1.35766	1.35705	1.36849
	1.35367	1.35446	1.3599
	1.3551	1.3547	1.35951
	1.3519	1.34884	1.35632
	1.35475	1.34888	1.35918
	1.35153	1.35036	1.35596
	1.35815	1.35024	1.35949
	NaN	1.35101	1.36165
	1.35416	1.35285	1.3581
	1.35075	1.3513	1.35562
	1.35905	1.35103	1.35992
	1.35962	1.35241	1.36292
	1.36312	1.35309	1.36291
	1.3566	1.3506	1.36095
	1.36084	1.3595	1.36952
	1.36164	1.35942	1.37023
	1.34564	1.34612	1.35894
	1.34811	1.34919	1.36073
	1.34451	1.34396	1.35492
	1.34952	1.34648	1.3573
	1.34555	1.34779	1.35852
	1.3504	1.3503	1.36006
	1.34658	1.34551	1.35858
	1.3543	1.35258	1.36155
	1.35489	1.35351	1.36184
	1.35675	1.35134	1.36047
	1.34935	1.34867	1.35746
	1.35577	1.3543	1.36281
	1.35395	1.35099	1.35803
	1.35193	1.35014	1.36051
	1.3605	1.35611	1.36454
	1.35	1.34753	1.35694
	1.35414	1.34948	1.35849
	1.35002	1.34483	1.35144
	1.34982	1.34769	1.36003
	1.35	1.35108	1.35586
	1.35189	1.35152	1.35981
	1.35494	1.35252	1.35951
	1.34652	1.34844	1.35621
	1.35331	1.35312	1.36117
	1.34853	1.34653	1.35429
	1.35044	1.35069	1.35671
	1.34948	1.34892	1.35714
	1.34848	1.35006	1.36134
	1.35011	1.34737	1.35505
	1.35194	1.34791	1.35567
	1.34909	1.35037	1.35938
	1.35058	1.34926	1.35794
	1.357	1.3529	1.36592
	1.35254	1.34774	1.36125
	1.35613	1.35665	1.36927
	1.35471	1.35256	1.36499
	1.34895	1.3472	1.35396
	1.35599	1.34714	1.35762
	1.3672	1.35954	1.36506
	1.35074	1.35244	1.36019
	1.35038	1.35067	1.3582
	1.35109	1.35092	1.36187
	1.3574	1.35142	1.36163
	1.36808	1.36024	1.36891
	1.35813	1.35539	1.36038
	1.35805	1.35155	1.36262
	1.35095	1.35141	1.35918
	1.35345	1.35295	1.36418
	1.35733	1.35988	1.36633
	1.36392	1.36	1.36848
	1.35873	1.35772	1.36912
	1.35669	1.35546	1.3658
	1.35533	1.35161	1.36132
	1.35077	NaN	NaN
	1.35752	1.3592	1.36488
	1.35041	1.34884	1.36323
	1.35502	1.35398	1.3652
	1.35899	1.35213	1.36442
	1.35214	NaN	NaN
	1.36254	1.35935	1.37086
	1.36667	1.36366	1.3777
	1.36248	1.35757	1.37214
	1.35221	1.34811	1.36279
	1.36616	1.36293	1.3694
	1.36073	1.35981	1.36306
	1.36391	1.3575	1.37033
	1.36125	1.35765	1.37141
	1.34922	1.34854	1.3576
	1.35046	1.35177	1.36734
	1.35944	1.35365	1.36292
	1.3584	1.3546	1.36484
	1.36471	1.36074	1.36934
	1.36214	1.36241	1.36997
	1.35541	1.35467	1.36942
	1.35598	1.35207	1.36661
	1.35674	1.35267	1.36763
	1.35562	1.34986	1.35899
	1.35568	1.35387	1.36185
	1.35437	1.3502	1.35896
	1.36217	1.35765	1.3647
	1.34727	1.34653	1.35775
	1.34619	1.34536	1.35358
	1.34627	1.34598	1.36033
	1.35219	1.34943	1.36104
	1.35214	1.34739	1.35675
	1.35083	1.34855	1.35884
	1.34922	1.35053	1.35587
	1.35253	1.34897	1.35993
	1.35602	1.3503	1.36297
	1.3491	1.34675	1.35646
	1.34947	1.34919	1.36316
	1.35534	1.35319	1.36275
	1.35087	1.35226	1.3623
	1.35253	1.34914	1.36008
	1.35361	1.34911	1.36018

## Sheet: Longitudinal modulus
	Longitudinal modulus [GPa]
	cytoplasm	nucleoplasm	nucleoli
	2.43411	2.47384	2.52963
	2.45278	2.4911	2.55327
	2.51321	2.53921	2.56547
	2.50851	2.53561	2.60221
	2.43435	2.47528	2.50902
	2.37843	2.44992	2.4619
	2.41585	2.46333	2.53183
	2.3513	2.41059	2.44268
	2.35788	2.38507	2.47172
	2.38945	2.43848	2.47168
	2.35886	2.42242	2.47068
	2.40237	2.40806	2.4445
	2.33277	2.42485	2.43884
	2.37497	2.39949	2.4566
	2.39005	2.40754	2.45717
	2.37214	2.4095	2.45365
	2.40234	2.42871	2.47049
	2.4198	2.46075	2.49291
	2.42097	2.45755	2.48675
	2.44409	2.45814	2.49815
	2.45629	2.48926	2.48376
	2.40353	2.4444	2.46216
	2.45524	NaN	NaN
	2.43281	NaN	NaN
	2.44461	2.48995	2.567
	2.47127	NaN	NaN
	2.48021	2.49894	NaN
	2.42342	2.46186	2.52253
	2.38824	2.43244	2.44765
	2.42831	2.44231	2.45681
	2.47577	2.49157	2.49889
	2.45019	2.41994	2.45564
	2.35383	2.37032	2.36686
	2.41123	2.42501	2.42937
	2.36895	2.38088	2.40182
	NaN	2.3839	2.41445
	2.48963	2.50358	2.50556
	2.38101	2.38593	2.46804
	2.41001	2.45219	2.492
	2.47778	2.47058	2.48358
	2.4369	2.44511	2.45404
	2.41185	2.36926	2.35075
	2.43405	2.4776	2.53666
	2.45671	2.50421	2.51813
	2.29681	2.38862	2.43464
	2.40087	2.50471	2.57588
	2.45061	2.51543	2.57202
	2.39194	2.43154	2.46364
	2.33598	2.41141	2.51366
	2.41257	2.44089	2.46109
	2.2635	2.32895	2.37313
	2.3614	2.40818	2.45584
	2.39234	2.46253	2.52058
	2.36931	2.40137	2.45183
	2.32429	2.43039	2.49072
	2.40113	2.48096	2.52287
	2.40106	2.44559	2.49103
	2.45255	2.48392	2.55636
	2.41646	2.47695	2.51506
	2.31436	2.36377	2.41326
	2.41115	2.41602	2.46433
	2.39665	2.4155	2.4227
	2.37785	2.43114	2.44272
	2.47611	2.50175	2.53365
	2.42381	2.465	2.49655
	2.41234	2.47788	2.51615
	2.36929	2.47109	2.55369
	2.38292	2.44803	2.48222
	2.39544	2.4554	2.48547
	2.35198	2.42585	2.44287
	2.51222	2.53604	2.58103
	2.4753	2.53808	2.59796
	2.30989	2.35275	2.38261
	2.38361	2.42769	2.48976
	2.39305	2.49974	2.56296
	2.40262	2.46366	2.55148
	2.51114	2.53986	2.61294
	2.32051	2.33935	2.34838
	2.39186	2.42246	2.43122
	2.25667	2.32452	2.35544
	2.26893	2.35902	2.39504
	2.3797	2.38974	2.42725
	2.42705	2.46339	2.48985
	2.40131	2.44497	2.49278
	2.37587	2.40447	2.45945
	2.3802	2.41847	2.48668
	2.38646	2.4111	2.46
	2.43895	2.46575	2.49531
	2.38712	2.41804	2.42679
	2.4328	2.41912	2.46079
	2.47018	2.51227	2.49727
	2.33777	2.46867	2.51248
	2.40737	2.46169	2.42997
	2.44332	2.48431	2.49851
	2.35731	2.43857	2.50051
	2.429	2.48785	2.5495
	2.4714	2.48079	2.52879
	2.40644	NaN	NaN
	2.40559	2.46083	2.46422
	2.32545	2.40678	2.42023
	2.41747	2.46077	2.50241
	2.41923	2.44596	2.47753
	2.34878	NaN	NaN
	2.34596	2.38752	2.41735
	2.4039	2.42982	2.48458
	2.36423	2.37587	2.39754
	2.34415	2.36813	2.43328
	2.35602	2.43933	2.44821
	2.3806	2.4256	2.43955
	2.40541	2.42691	2.47503
	2.30788	2.37455	2.47463
	2.4241	2.44449	2.47721
	2.50336	2.51472	2.5316
	2.56521	2.56555	2.60471
	2.54067	2.54667	2.59256
	2.55581	2.57152	2.59947
	2.55796	2.58655	2.58916
	2.34231	2.38756	2.45349
	2.36353	2.40791	2.44829
	2.39199	2.43075	2.48637
	2.44778	2.48522	2.52827
	2.44353	2.46288	2.51079
	2.49292	2.52716	2.54441
	2.45574	2.48744	2.53165
	2.45225	2.45717	2.5165
	2.47252	2.49633	2.55532
	2.45037	2.50489	2.59695
	2.52103	2.52759	2.59854
	2.42359	2.44541	2.49585
	2.3861	2.42125	2.46666
	2.44106	2.46072	2.47371
	2.33477	2.40334	2.45159
	2.44861	2.45141	2.49863
	2.45617	2.50933	2.55321
	2.50943	2.54423	2.61361
	2.32753	2.39543	2.44081
	2.36725	2.38772	2.39451
	2.43323	2.41053	2.44202
	2.40333	2.45054	2.49772

## Sheet: Brillouin shift
	Brillouin shift [GHz]
	cytoplasm	nucleoplasm	nucleoli
	7.85129	7.91496	8.00796
	7.87948	7.94012	8.04293
	7.98314	8.02197	8.06744
	7.97143	8.01307	8.12362
	7.85114	7.91625	7.97371
	7.75842	7.87373	7.89747
	7.82377	7.89951	8.01329
	7.7144	7.81147	7.86788
	7.72653	7.76955	7.91387
	7.7808	7.85954	7.91682
	7.72548	7.82879	7.91027
	7.79618	7.80503	7.86587
	7.68307	7.83283	7.85897
	7.75533	7.79375	7.89022
	7.77868	7.80667	7.89006
	7.75138	7.81094	7.88653
	7.79697	7.83913	7.90947
	7.82775	7.89205	7.94755
	7.83236	7.89047	7.94016
	7.86983	7.88902	7.95818
	7.88922	7.94213	7.93518
	7.80565	7.86809	7.90186
	7.88893	NaN	NaN
	7.85114	NaN	NaN
	7.8666	7.93798	8.06608
	7.9088	NaN	NaN
	7.92174	7.95221	NaN
	7.83451	7.89771	7.99883
	7.77888	7.85033	7.87829
	7.84176	7.86472	7.89035
	7.91924	7.94434	7.9574
	7.87594	7.82575	7.88603
	7.72002	7.74455	7.74319
	7.81292	7.83458	7.84323
	7.74708	7.7625	7.80106
	NaN	7.76772	7.82211
	7.94046	7.96208	7.96649
	7.7632	7.77133	7.90614
	7.81422	7.87867	7.94591
	7.92338	7.90872	7.93369
	7.85964	7.86816	7.88675
	7.81594	7.74388	7.71822
	7.85427	7.92366	8.0229
	7.89113	7.9663	7.99294
	7.62159	7.77262	7.85271
	7.79329	7.9613	8.07856
	7.87192	7.97554	8.06962
	7.77949	7.8424	7.89871
	7.68691	7.8105	7.98021
	7.81442	7.85945	7.89658
	7.56646	7.67448	7.75298
	7.73298	7.80799	7.88988
	7.78347	7.896	7.99268
	7.74632	7.79611	7.88187
	7.66821	7.84141	7.94112
	7.7979	7.92556	7.9962
	7.79716	7.86747	7.94369
	7.87885	7.92861	8.04834
	7.82512	7.92059	7.98549
	7.65251	7.73284	7.81768
	7.81277	7.81908	7.90092
	7.78783	7.81572	7.83039
	7.75698	7.84264	7.8677
	7.91608	7.95785	8.01022
	7.83349	7.90043	7.95342
	7.81585	7.92019	7.98431
	7.74144	7.90703	8.04189
	7.7674	7.87278	7.93128
	7.7847	7.88086	7.93249
	7.71507	7.83524	7.86611
	7.97291	8.01056	8.08525
	7.91302	8.01399	8.11188
	7.64521	7.71482	7.76686
	7.76726	7.83714	7.94017
	7.78137	7.95387	8.05797
	7.79716	7.89576	8.03896
	7.97558	8.01898	8.13981
	7.66437	7.69319	7.71364
	7.78399	7.83414	7.85007
	7.55932	7.67107	7.72732
	7.57662	7.72512	7.78659
	7.76318	7.77524	7.84108
	7.84668	7.90106	7.94624
	7.79642	7.86761	7.94775
	7.7543	7.80108	7.89321
	7.7615	7.82372	7.93901
	7.77413	7.81218	7.89524
	7.86679	7.90529	7.95666
	7.77733	7.82617	7.84203
	7.85041	7.82507	7.89735
	7.90735	7.97548	7.95443
	7.69266	7.90539	7.98014
	7.80912	7.89822	7.85093
	7.87108	7.93465	7.96188
	7.7236	7.86002	7.96512
	7.84379	7.9377	8.04113
	7.91117	7.9242	8.00526
	7.80282	NaN	NaN
	7.80697	7.89694	7.90444
	7.67074	7.80364	7.83165
	7.82397	7.89315	7.96523
	7.82911	7.86886	7.92517
	7.71041	NaN	NaN
	7.71116	7.77783	7.83215
	7.80864	7.84911	7.94412
	7.74143	7.75764	7.80153
	7.70289	7.74059	7.85284
	7.73074	7.86423	7.88175
	7.76787	7.84058	7.86447
	7.8091	7.8411	7.92417
	7.64857	7.75608	7.92453
	7.83187	7.86452	7.92129
	7.96018	7.979	8.01182
	8.06205	8.0597	8.12543
	8.02231	8.03007	8.10705
	8.05036	8.07304	8.12061
	8.05335	8.09878	8.10596
	7.702	7.77563	7.88954
	7.73676	7.80723	7.87892
	7.78309	7.8443	7.94103
	7.87294	7.93061	8.00324
	7.86681	7.89701	7.97732
	7.94465	7.99727	8.0283
	7.89039	7.93856	8.01246
	7.87611	7.88375	7.98342
	7.90795	7.94567	8.04285
	7.87229	7.95953	8.11095
	7.98851	7.99765	8.11437
	7.83198	7.86522	7.9501
	7.77052	7.82681	7.90462
	7.85955	7.89229	7.91441
	7.68766	7.79814	7.88095
	7.87491	7.87653	7.95816
	7.88343	7.96722	8.04077
	7.96865	8.02378	8.13885
	7.67642	7.78729	7.86517
	7.73994	7.77437	7.78915
	7.84748	7.80986	7.86522
	7.80045	7.87452	7.9549

## Sheet: Absolute density
	Absolute density [g/ml]
	cytoplasm	nucleoplasm	nucleoli
	1.02434	1.02401	1.03436
	1.01986	1.01791	1.02852
	1.03679	1.03115	1.0405
	1.027	1.02366	1.03743
	1.02338	1.02161	1.03044
	1.01873	1.01697	1.02792
	1.02939	1.02721	1.03834
	1.01885	1.01995	1.03079
	1.02268	1.01929	1.02976
	1.02908	1.02761	1.03646
	1.01627	1.01568	1.02501
	1.01554	1.01445	1.01894
	1.01731	1.01575	1.0245
	1.02544	1.02075	1.03094
	1.02132	1.02022	1.02827
	1.02624	1.02293	1.03326
	1.01748	1.01603	1.02383
	1.02386	1.02007	1.02909
	1.03015	1.02772	1.03444
	1.03045	1.02179	1.03415
	1.02939	1.02963	1.03379
	1.0336	1.02471	1.03694
	1.03348	NaN	NaN
	1.02904	NaN	NaN
	1.02054	1.01738	1.03178
	1.01882	NaN	NaN
	1.01612	1.01726	NaN
	1.02533	1.02839	1.03855
	1.02913	1.02882	1.03645
	1.0238	1.0246	1.03004
	1.02683	1.02654	1.0297
	1.02151	1.01803	1.02451
	1.02319	1.017	1.02772
	1.02068	1.01926	1.02309
	1.02808	1.018	1.02893
	NaN	1.01926	1.03008
	1.02459	1.02309	1.02587
	1.01946	1.01974	1.02521
	1.02893	1.01994	1.0285
	1.02879	1.02138	1.03129
	1.03343	1.02223	1.03214
	1.02571	1.0193	1.03068
	1.03169	1.03012	1.04252
	1.03251	1.03054	1.04112
	1.01118	1.01216	1.02605
	1.01524	1.01675	1.02881
	1.00991	1.00998	1.022
	1.01655	1.01276	1.02455
	1.01275	1.01432	1.02825
	1.01978	1.01814	1.02936
	1.0126	1.01169	1.02575
	1.02377	1.02068	1.03262
	1.02398	1.02175	1.03158
	1.02573	1.01944	1.02928
	1.01513	1.01495	1.0223
	1.02485	1.02235	1.03168
	1.02328	1.01889	1.027
	1.01901	1.01775	1.0297
	1.03053	1.02542	1.0355
	1.01676	1.01416	1.02439
	1.02207	1.01714	1.02699
	1.01793	1.01081	1.01839
	1.01729	1.01467	1.03008
	1.01818	1.01993	1.02453
	1.02148	1.02301	1.02893
	1.02399	1.02087	1.02879
	1.01293	1.01535	1.02438
	1.02232	1.02182	1.03107
	1.01461	1.01289	1.02147
	1.01772	1.0173	1.0256
	1.01637	1.01603	1.02565
	1.01353	1.01668	1.0258
	1.01697	1.01431	1.02226
	1.01926	1.01488	1.02343
	1.01621	1.01802	1.02794
	1.01816	1.01689	1.02588
	1.02672	1.02165	1.0368
	1.02063	1.01529	1.0288
	1.02699	1.02809	1.03241
	1.02341	1.02099	1.03384
	1.01569	1.01399	1.02104
	1.02445	1.01396	1.02624
	1.0402	1.03032	1.0373
	1.01969	1.02118	1.02992
	1.01783	1.01842	1.02693
	1.0184	1.01827	1.03238
	1.02479	1.01963	1.03035
	1.04206	1.03143	1.04123
	1.02948	1.02622	1.03024
	1.02734	1.01966	1.03202
	1.02031	1.02231	1.02871
	1.02093	1.02067	1.03234
	1.02794	1.0303	1.03896
	1.03605	1.03063	1.04121
	1.02914	1.02785	1.04162
	1.02625	1.02461	1.03808
	1.02432	1.01938	1.03075
	1.01539	NaN	NaN
	1.0287	1.03056	1.03535
	1.01635	1.01584	1.03089
	1.02374	1.02182	1.03531
	1.02868	1.02048	1.03416
	1.01943	NaN	NaN
	1.03321	1.0296	1.04314
	1.03954	1.03555	1.05167
	1.03335	1.02683	1.04636
	1.01952	1.0153	1.03136
	1.03976	1.03473	1.04232
	1.03228	1.03146	1.03454
	1.03503	1.02796	1.04108
	1.03308	1.02818	1.0435
	1.01616	1.01557	1.02614
	1.01947	1.02124	1.03502
	1.02931	1.02239	1.03266
	1.02669	1.02251	1.03406
	1.0363	1.03154	1.04032
	1.03538	1.03639	1.04326
	1.0246	1.02364	1.04103
	1.02469	1.02001	1.03562
	1.02477	1.02064	1.03798
	1.02384	1.01773	1.02784
	1.02524	1.02288	1.03206
	1.02238	1.01806	1.02698
	1.03456	1.02822	1.03693
	1.01341	1.01278	1.02578
	1.01185	1.01111	1.02067
	1.01161	1.01184	1.02746
	1.02001	1.01697	1.02956
	1.01957	1.01408	1.02468
	1.01758	1.01529	1.02687
	1.01747	1.01996	1.02297
	1.01989	1.01599	1.02826
	1.02532	1.01796	1.03288
	1.01607	1.01326	1.02375
	1.01672	1.01664	1.0317
	1.02277	1.02111	1.03153
	1.01747	1.02013	1.02984
	1.01894	1.01622	1.02719
	1.02214	1.01632	1.02851
