# Supplementary material for: Correlative all-optical quantification of mass density and mechanics of subcellular compartments with fluorescence specificity
Source: eLife journal article supplement (doi:10.7554/elife.68490), 2022-01-10
Supplement: supp [file elife-68490-supp-v1.zip › elife_poa_e68490_Figure_3_source_data_1.xlsx]

## Sheet: Refractive index
	Refractive index
	periphery	polyQ
	1.34861	1.37516
	1.34471	1.37935
	1.34464	1.38089
	1.34344	1.37062
	1.35072	1.38088
	1.34516	1.37117
	1.34746	1.37811
	1.35009	1.38967
	1.34551	1.39017
	1.34371	1.37653
	1.35225	1.39317
	1.36006	1.40134
	1.35936	1.39325
	1.35489	1.39271
	1.34941	1.39025
	1.36678	1.39758
	1.35236	1.3832
	1.35283	1.39203
	1.34932	1.38651
	1.34641	1.38665
	1.35383	1.3818
	1.35143	1.39204

## Sheet: Brillouin shift
	Brillouin shift [GHz]
	periphery	polyQ
	7.89936	8.49637
	7.91606	8.65154
	7.95982	8.92404
	7.79399	8.83653
	7.88994	8.49192
	7.85723	8.49013
	7.79201	8.99137
	7.78532	8.99968
	7.83784	8.97522
	7.93424	9.04068
	7.80739	8.78885
	7.83095	9.08373
	7.89887	8.82174
	7.80892	8.89878
	7.83683	8.74697
	7.9173	8.49207
	7.80442	8.69091
	7.94115	8.92842
	7.89455	8.7426
	7.86877	8.75894
	7.95597	8.65081
	7.7019	8.85404

## Sheet: Longitudinal modulus
	Longitudinal modulus [GPa]
	periphery	polyQ
	2.46608	2.84911
	2.47786	2.95053
	2.50545	3.13792
	2.40258	3.08639
	2.45951	2.84261
	2.44077	2.84502
	2.39961	3.22596
	2.39473	3.22278
	2.42885	3.169
	2.49073	3.22172
	2.40774	3.04088
	2.41935	3.26685
	2.47293	3.07873
	2.40717	3.11793
	2.42645	3.01273
	2.47183	2.83687
	2.40574	2.98839
	2.49076	3.14309
	2.46232	3.01012
	2.4472	3.02293
	2.49966	2.9505
	2.34331	3.09652
