# Supplementary material for: Correlative all-optical quantification of mass density and mechanics of subcellular compartments with fluorescence specificity
Source: eLife journal article supplement (doi:10.7554/elife.68490), 2022-01-10
Supplement: supp [file elife-68490-supp-v1.zip › elife_poa_e68490_Figure_4_source_data_1.xlsx]

## Sheet: Refractive index
	Refractive index
	control		arsenite			arsenite, fixed
	cytoplasm	nucleoplasm	peri-SG cytoplasm	nucleoplasm	SG	peri-SG cytoplasm	nucleoplasm	SG
	1.34866	1.36584	1.34274	1.34801	1.34528	1.34727	1.34567	1.34584
	1.35109	1.3566	1.34344	1.34519	1.34055	1.34699	1.34734	1.34802
	1.3535	1.3538	1.34877	1.34191	1.33851	1.34602	1.34745	1.34575
	1.35742	1.35484	1.34726	1.35261	1.34137	1.34438	1.34691	1.34137
	1.35116	1.35955	1.34779	1.3561	1.34203	1.34111	1.34882	1.34603
	1.35276	1.36013	1.35154	1.34407	1.33905	1.34175	1.3462	1.34553
	1.34925	1.35035	1.34208	1.34543	1.34169	1.34285	1.35352	1.34533
	1.34317	1.36544	1.34203	1.35012	1.34192	1.34118	1.34744	1.34705
	1.35145	1.3495	1.34679	1.34931	1.34518	1.34929	1.34886	1.34277
	1.35381	1.35469	1.33832	1.34963	1.34653	1.34699	1.34997	1.34297
	1.3511	1.35247	1.34674	1.34528	1.33688	1.34507	1.34932	1.34452
	1.34706	1.35395	1.34225	1.34395	1.34683	1.35103	1.34704	1.34564
	1.35047	1.34803	1.34258	1.34619	1.34493	1.33929	1.3488	1.3396
	1.3434	1.34708	1.33858	1.35089	1.33999	1.3445	1.34496	1.34589
	1.3512	1.34895	1.3463	1.35471	1.35156	1.34671	1.34551	1.34521
	1.34662	1.34748	1.3398	1.34604	1.34571	1.3435	1.34794	1.3457
	1.34797	1.34914	1.34988	1.34674	1.34884	1.34887	1.3522	1.34588
	1.33796	1.35039	1.34246	1.35115	1.34291	1.34388	1.34453	1.34562
	1.34982	1.35071	1.34293	1.34822	1.34974	1.34323	1.34881	1.34254
	1.3549	1.34993	1.34087	1.34468	1.34494	1.34495	1.34721	1.35209
	1.35727	1.35494	1.34425	1.34771	1.34421	1.3405	1.35451	1.34508
	1.33923	1.35361	1.35119	1.3471	1.34741	1.34091	1.34863	1.35023
	1.33913	1.35045	1.35082	1.34932	1.34341	1.34566	1.35124	1.34097
	1.35768	1.34907	1.34732	1.34503	1.34552	1.34166	1.35202	1.34423
	1.34642	1.35524	1.34872	1.34559	1.34237	1.33941	1.35168	1.34347
	1.34607	1.34616	1.34477	1.34308	1.3443	1.3413	1.34619	1.34616
	1.34188	1.34873	1.34695	1.34549	1.33878	1.34238	1.34317	1.35205
	1.34356	1.34585	1.34245	1.34568	1.34176	1.34597	1.35159	1.34633
	1.34234	1.34822	1.3474	1.34827	1.34459	1.34718	1.35066	1.3467
	1.34209	1.34574	1.34923	1.34821	1.34644	1.34149	1.34684	1.34314
	1.34543	1.34891	1.3395	1.34365	1.3426	1.33926	1.3474	1.34531
	1.34589	1.34385	1.34517	1.35447	1.35393	1.35131	1.34836	1.34799
		1.34468	1.35326	1.34714	1.34443	1.34743		1.34702
		1.34768	1.34236		1.34622	1.34474		1.34258
		1.34458	1.35835		1.34411	1.34302		1.34088
		1.34279	1.3469		1.34568	1.34497		1.35015
		1.34623	1.3512		1.34405			1.34802
		1.34882	1.33921		1.35031			1.34642
			1.34454					1.34235
			1.34434					1.34333
			1.34311
			1.34995

## Sheet: Longitudinal modulus
	Longitudinal modulus [GPa]
	control		arsenite			arsenite, fixed
	cytoplasm	nucleoplasm	peri-SG cytoplasm	nucleoplasm	SG	peri-SG cytoplasm	nucleoplasm	SG
	2.36716	2.45272	2.37586	2.42204	2.33134	2.34264	2.4043	2.42478
	2.45523	2.41366	2.4018	2.4705	2.37562	2.37424	2.44402	2.38894
	2.4407	2.49696	2.39037	2.42333	2.41072	2.32929	2.3862	2.39932
	2.40773	2.45557	2.34469	2.4505	2.35045	2.27277	2.4113	2.34947
	2.41239	2.46133	NaN	2.45079	2.39024	2.28256	2.42421	2.40333
	2.34656	2.46241	2.42457	2.40168	2.44048	2.30523	2.42955	2.36823
	2.34717	2.42496	2.27484	2.44951	2.34031	2.31227	2.44731	2.38432
	2.32042	2.40164	2.40355	2.41528	2.28361	2.31743	2.42594	2.40472
	2.3651	2.38124	2.3955	2.43709	2.35785	2.28873	2.42191	2.44476
	2.42155	2.40682	2.38874	2.33519	2.36689	2.28442	2.40495	2.35226
	2.44091	2.38441	2.30804	2.46765	2.27097	2.31814	2.41579	2.34621
	2.3628	2.38448	2.30293	2.33265	2.45254	2.40813	2.45481	2.35843
	NaN	2.41789	2.33388	2.41057	2.3575	2.31853	2.43369	2.37863
	2.30201	2.38464	2.32171	2.48116	2.34527	2.36723	2.35275	2.36826
	2.39363	2.39642	2.30189	2.48413	2.36974	2.36592	2.3666	2.32795
	2.35575	2.37075	2.40681	2.38527	2.28112	2.34621	2.42339	2.39141
	2.38643	2.41528	2.3578	2.33778	2.32212	2.3711	2.50845	2.31499
	2.26744	2.43312	2.28582	2.44688	2.27147	2.35659	2.36038	2.35305
	2.40184	2.42032	2.27286	2.40316	2.28354	2.31551	2.42908	2.32202
	2.43658	2.42185	2.30435	2.36128	2.29263	2.38454	2.42026	2.27456
	2.37404	2.45769	2.2555	2.38711	2.33915	2.35768	2.44406	2.33458
	2.3648	2.42115	2.25445	2.39126	2.31592	2.33659	2.42202	2.39615
	2.29065	2.39986	2.26552	2.37958	2.33424	2.34357	2.35577	2.32151
	2.39545	2.40392	NaN	2.31163	2.37073	2.32359	2.41507	2.37318
	2.33548	2.41778	2.2391	NaN	2.28064	2.31917	2.38501	2.37087
	2.35367	2.39924	2.37396	2.34323	2.29988	2.30198	2.38755	2.36494
	2.28263	2.39405	2.29483	2.3479	2.27792	2.39261	2.41128	2.37563
	2.30728	2.46535	2.27166	2.29979	2.2712	2.33532	2.44585	2.35382
	2.28379	2.40731	2.32159	2.36756	2.28371	2.33444	2.37204	2.34882
	2.33761	2.38406	2.32849	2.35743	2.38498	2.34027	2.41498	2.33128
	2.31443	2.38235	2.24101	2.35023	2.33335	2.35015	2.45841	2.41226
	2.31072	2.38533	2.22186	2.38072	2.39062	2.3403	2.43111	2.31964
		2.37093	2.28814	2.31177	2.37354	2.28005		2.3543
		2.40439	2.27805		2.34772	2.29135		2.33447
		2.39062	2.37284		2.34783	2.32096		2.33373
		2.40661	2.32106		2.40973	2.2973		2.3511
		2.40757	2.34404		2.41284			2.2963
		2.2701	2.35101		2.44693			2.2752
			2.36633					2.33627
			2.33723					2.35251
			2.40021
			2.42356
