# Supplementary material for: Correlative all-optical quantification of mass density and mechanics of subcellular compartments with fluorescence specificity
Source: eLife journal article supplement (doi:10.7554/elife.68490), 2022-01-10
Supplement: supp [file elife-68490-supp-v1.zip › elife_poa_e68490_Supplementary_file_3.docx]

**Supplementary Table 3.** Average values and standard errors of the mean of the RI , Brillouin shift , absolute density and longitudinal modulus for the cytoplasm and polyQ aggregates of 22 wild-type HeLa cells.

| compartment | RI  *n* | Brillouin shift  *ν*B [GHz] | absolute density  *ρ* [g/ml] | longitudinal modulus  *M’* [GPa] |
| --- | --- | --- | --- | --- |
| cytoplasm | 1*.*3506 ± 0*.*0013 | 7*.*861 ± 0*.*014 | 1*.*020 ± 0*.*002 | 2*.*442 ± 0*.*009 |
| polyQ aggregate | 1*.*3856 ± 0*.*0018 | 8*.*789 ± 0*.*040 | 1*.*061 ± 0*.*003 | 3*.*051 ± 0*.*029 |
