# Supplementary figures and images for: Correlative all-optical quantification of mass density and mechanics of subcellular compartments with fluorescence specificity
Source: eLife journal article supplement (doi:10.7554/elife.68490), 2022-01-10

$\rho$  [g/ml]

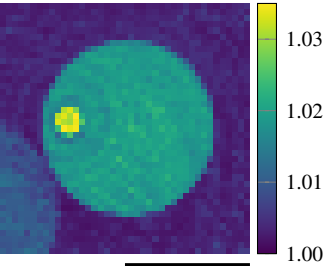

Supplement: supp [file elife-68490-supp-v1.zip › elife_poa_e68490_Figure_1_figure_supplement_1.pdf]

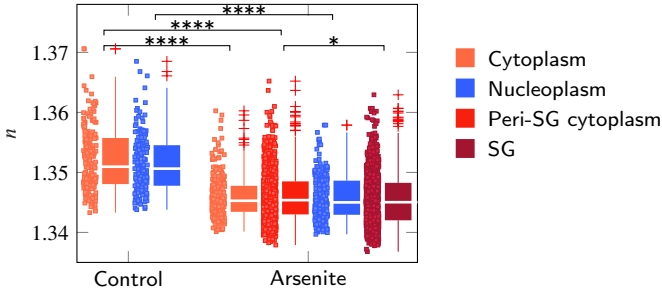

Supplement: supp [file elife-68490-supp-v1.zip › elife_poa_e68490_Figure_4_figure_supplement_2.pdf]
